# Supplementary material for: Reaction induced robust PdxBiy/SiC catalyst for the gas phase oxidation of monopolistic alcohols
Source: Royal Society of Chemistry journal article supplement (doi:10.1039/d0ra07859j), 2020-01-01
Supplement: d0ra07859j1.pdf [file d0ra07859j1.pdf]

## **Supporting Information**

### **Reaction induced robust Pd<sub>x</sub>Bi<sub>y</sub>/SiC catalyst for the gas phase oxidation of monopolistic alcohols**

Pengwei Wang\*, Lijun Xu, Jianming Zhu, Kunqi Gao, Zhang Yan; Jifen Wang\*

E-mail: pwwang@sspu.edu.cn; wangjifen@sspu.edu.cn.

The calculation method of benzyl alcohol conversion and benzaldehyde selectivity

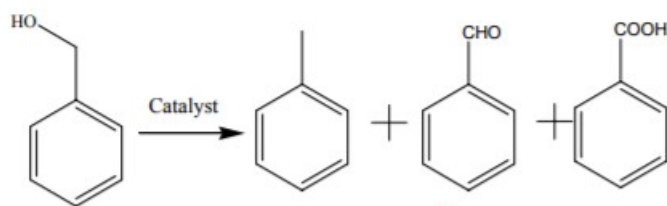

Correction factor: 
$$f_i = \frac{m_i}{m_D} * \frac{A_D}{A_i}$$

$m_i$ : the weight of the substance;  $m_D$ : the weight of internal material DMSO;  $A_D$ : the peak area of DMSO in gas chromatography (GC);  $A_i$ : the peak area of the substances in GC.

benzyl alcohol conversion: 
$$Conver. = 1 - \frac{m_D' * f_P * \frac{A_P'}{A_D'}}{m_P}$$

$m_D'$ : the weight of DMSO added into the system;  $f_P$ : correction factor of benzyl alcohol;  $A_P'$ : the peak area of benzyl alcohol after reaction;  $A_D'$ : the peak area of DMSO added into the system;  $m_P$ : the weight of benzyl alcohol added before the reaction

Benzyl aldehyde selectivity: 
$$Sel. = \frac{m_D' * f_t * \frac{A_t'}{A_D'}}{m_P * Conver.}$$

$f_t$ : correction factor of benzaldehyde;  $A_t'$ : the peak area of benzaldehyde after reaction

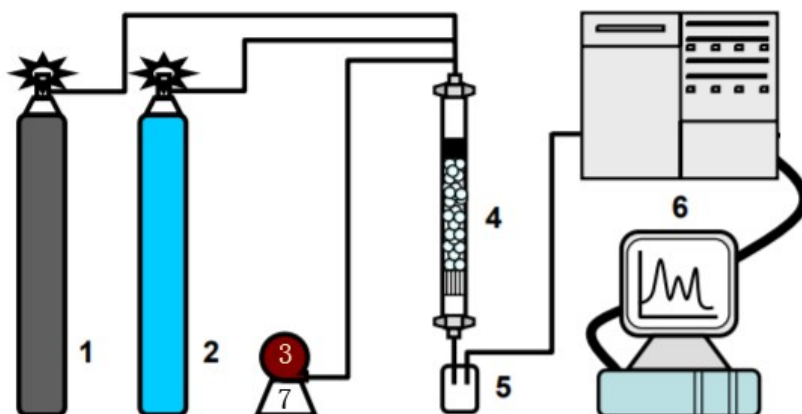

**Scheme S1.** The fix-bed reactor used in alcohol oxidation

(1. N<sub>2</sub> cylinder; 2. O<sub>2</sub> cylinder; 3. Pump; 4. Reactor tube; 5. Condensator; 6. GC; 7.

alcohol)

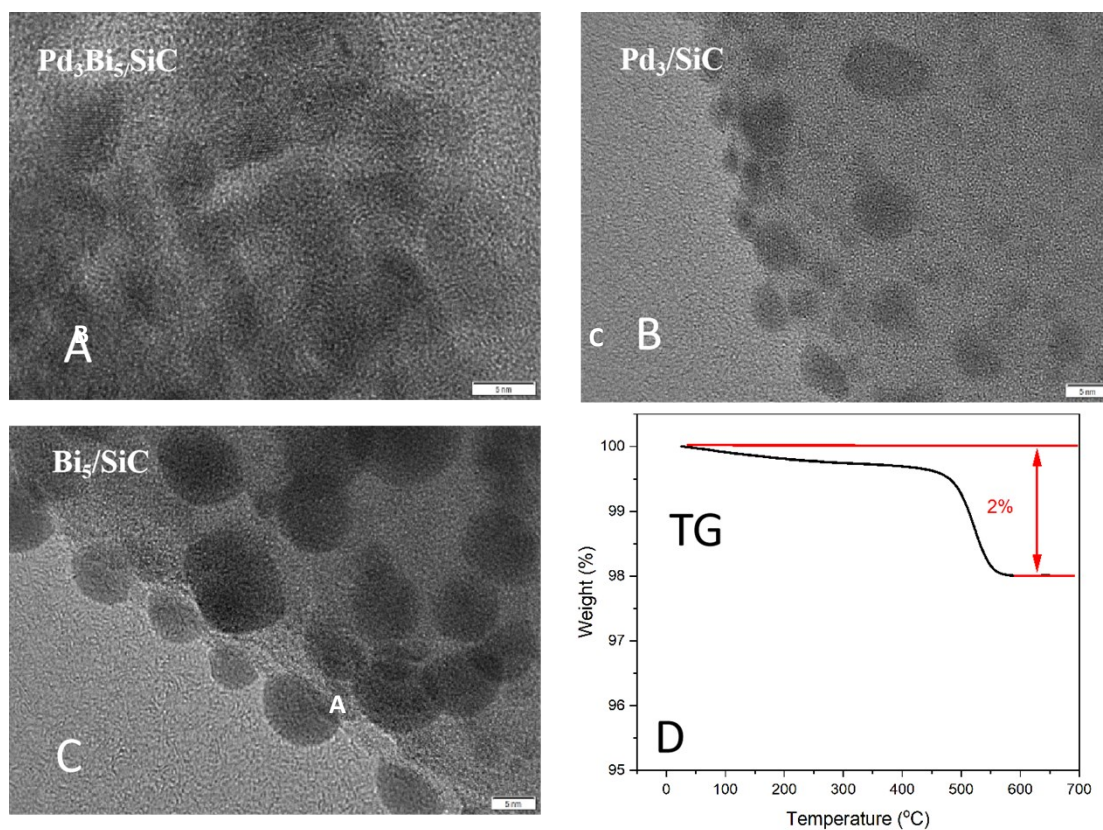

**Fig. S1.** TEM images of  $\text{Pd}_3\text{Bi}_5/\text{SiC}$  fresh (A), used  $\text{Pd}_3/\text{SiC}$  (B), used  $\text{Bi}_5/\text{SiC}$  catalysts (C) and TG curve of used  $\text{Pd}_3\text{Bi}_5/\text{SiC}$  (D)

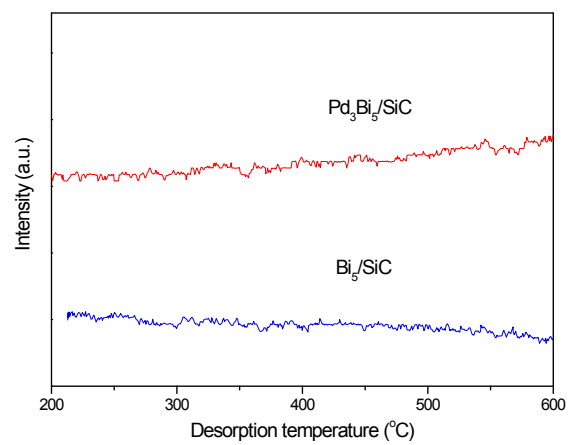

**Fig. S2.** O<sub>2</sub>-TPD profiles of the catalysts

**Table S1.** Catalytic performance of Pd<sub>3</sub>Bi<sub>5</sub>/SiC

| Alcohol         | Temperature | Conversion | Selectivity |
|-----------------|-------------|------------|-------------|
|                 | e           | (%)        | (%)         |
|                 | (°C)        |            |             |
| 1-phenylethanol | 280         | 75         | 98          |
| 2-phenylethanol | 300         | 55         | 97          |
| methanol        | 280         | 91         | 92          |
| ethanol         | 290         | 88         | 93          |

**Table S2.** The turnover frequencies (TOFs) of benzyl alcohol oxidation over the catalysts based on Pd NPs<sup>a</sup>.

| Catalyst                                          | $V_{\text{total}}^b$<br>( $\times 10^{-4}$ , cm <sup>3</sup> ) | $D_{\text{Pd}}^c$<br>(nm) | $V_{\text{Pd-particle}}^d$<br>(nm <sup>3</sup> ) | Amount of<br>Pd Particles<br>( $\times 10^{14}$ ) | $S_{\text{Pd-particle}}^e$<br>(nm <sup>2</sup> ) | $S_{\text{total}}$<br>(cm <sup>2</sup> ) | Amount of<br>Surface Ag<br>Atoms <sup>e</sup> ( $\times 10^{18}$ ) | Conv. <sup>f</sup><br>(%) | $N^g$<br>( $\times 10^{22}$ ) | TOF<br>(h <sup>-1</sup> ) |
|---------------------------------------------------|----------------------------------------------------------------|---------------------------|--------------------------------------------------|---------------------------------------------------|--------------------------------------------------|------------------------------------------|--------------------------------------------------------------------|---------------------------|-------------------------------|---------------------------|
| Pd <sub>3</sub> Bi <sub>5</sub> /SiC <sup>h</sup> | 7.5                                                            | 5.8                       | 51                                               | 147                                               | 52.8                                             | 7761                                     | 11.4                                                               | 12                        | 10.08                         | 8842                      |
| Pd <sub>3</sub> Bi <sub>5</sub> /SiC <sup>i</sup> | 7.5                                                            | 5.8                       | 51                                               | 147                                               | 52.8                                             | 7761                                     | 11.4                                                               | 3                         | 2.52                          | 2210                      |
| Pd <sub>3</sub> /SiC <sup>h</sup>                 | 7.5                                                            | 5.5                       | 43                                               | 174                                               | 47.5                                             | 8265                                     | 12.2                                                               | 0.3                       | 0.252                         | 206                       |
| Pd <sub>3</sub> /SiC <sup>i</sup>                 | 7.5                                                            | 5.5                       | 43                                               | 174                                               | 47.5                                             | 8265                                     | 12.2                                                               | 0.1                       | 0.080                         | 65                        |

<sup>a</sup>For each catalyst, 0.3 g was used in testing experiments; <sup>b</sup>The total volume of Pd ( $V_{\text{total}}$ ) is calculated as: Pd mass (0.3 g  $\times$  Pd-loading (wt%)) is divided by the silver density (12 g/cm<sup>3</sup>); <sup>c</sup>The particle size is estimated from TEM images; <sup>d</sup>The Pd NPs are assumed as hemisphere, and the volume of single Pd particle is  $\pi D_{\text{Pd}}^3/12$ , and the surface area is  $\pi D_{\text{Pd}}^2/2$ ; <sup>e</sup>The distance between the adjacent Pd atoms is 0.26 nm, and one Pd atom occupies the surface area of 0.0676 (0.26  $\times$  0.26 = 0.0676) nm<sup>2</sup>; <sup>f</sup>The weight hourly space velocity (WHSV) = 500 h<sup>-1</sup>, and 150 g benzyl alcohol was fed into the reactor; <sup>g</sup>Amount of converted benzyl alcohol (Take the converted benzyl alcohol over the catalyst Pd<sub>3</sub>Bi<sub>5</sub>/SiC as example: the converted benzyl alcohol in one hour is 18 g (150  $\times$  0.12 = 18 g), and the converted amount of benzyl alcohol molecule is  $3.36 \times 10^{22}$  (18 (g)  $\div$  108 (g/mol) = 0.1668 mol;  $0.1668 \times 6.02 \times 10^{23} = 10.08 \times 10^{22}$ )); <sup>h</sup>260 °C; <sup>i</sup>240 °C.
